# Supplementary material
Source: PubMed Central journal article supplement (PMC423256)

**A**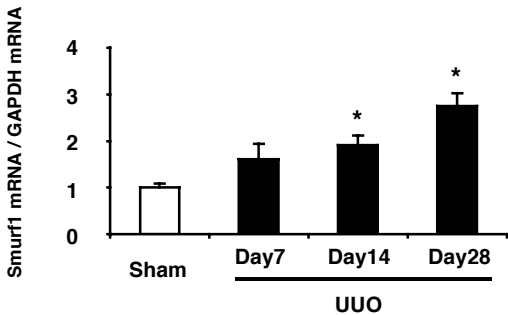**B**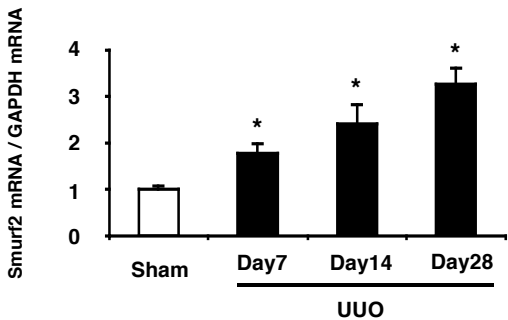

Supplement: pnas_101_23_8687__1.pdf [file pnas_101_23_8687__1.pdf]
